# Supplementary material for: Stratospheric impact on the Northern Hemisphere winter and spring ozone interannual variability in the troposphere
Source: Copernicus journal article supplement (doi:10.5194/acp-2019-825), 2019-10-21
Supplement: Supplementary file 1 [file acp-2019-825-supplement.pdf]

# Supplementary material to “Stratospheric impact on the Northern Hemisphere winter and spring ozone interannual variability in the troposphere”

Junhua Liu<sup>1,2</sup>, Jose M. Rodriguez<sup>2</sup>, Luke D. Oman<sup>2</sup>, Anne R., Douglass<sup>3</sup>, Mark A. Olsen<sup>4</sup>, Lu Hu<sup>5</sup>

<sup>1</sup> Universities Space Research Association (USRA), GESTAR, Columbia, MD, USA

<sup>2</sup> NASA Goddard Space Flight Center, Greenbelt, MD, USA

<sup>3</sup> TriVector Services Inc., Huntsville, AL, USA

<sup>4</sup> NOAA/OAR/Office of Weather and Air Quality

<sup>5</sup> Department of Chemistry and Biochemistry, University of Montana, Missoula, MT, USA

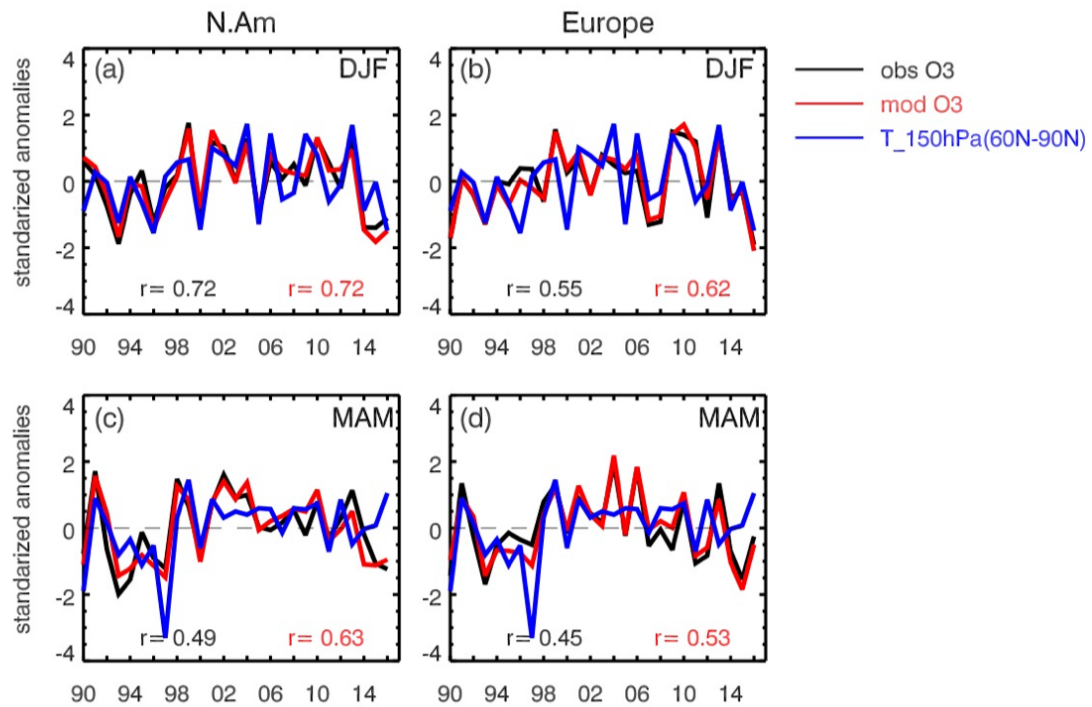

Figure S1: Standardized anomalies of observed (black) and simulated (red) O<sub>3</sub> averaged over the North American stations (left) and over the European stations (right) at 200 hPa with averaged temperature around the polar cap for latitudes north of 60°N (blue), which is a good measure of the overall temperature in the polar vortex. Correlation coefficient between observed O<sub>3</sub> and temperature (black), simulated O<sub>3</sub> and temperature (red) is shown in each panel.

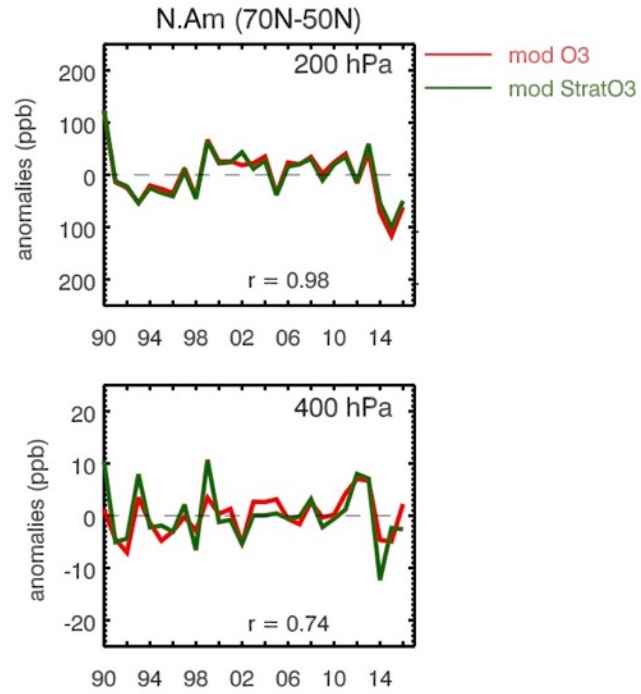

Figure S2: Time series plots of simulated ozone (red) and StratO<sub>3</sub> (green) anomalies (unit: ppb) at 200 hPa (top), 400hPa (bottom) averaged from the selected ozonesonde sites over the 50°N - 70°N sub-region of North America in winter from 1990 to 2016.

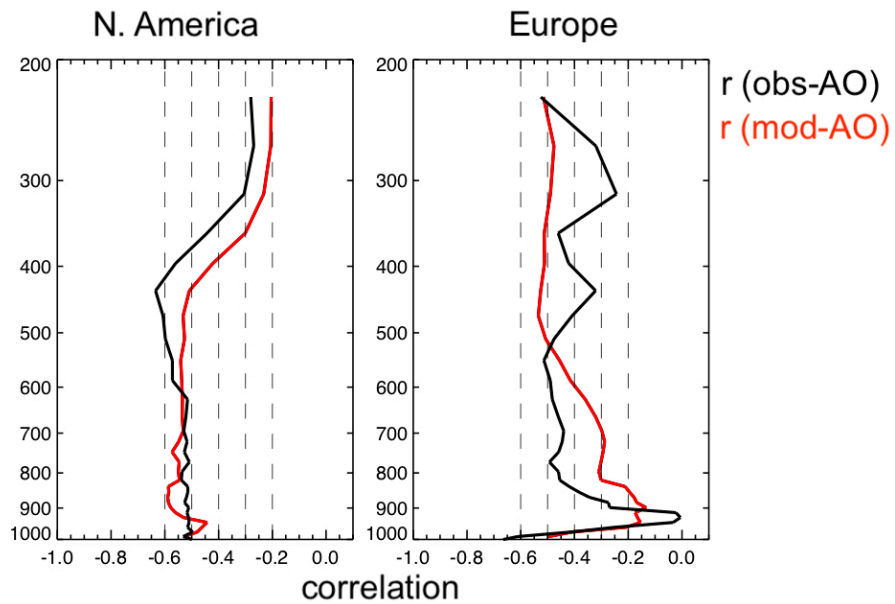

Figure S3: Profiles of correlations between O<sub>3</sub> and AO index in winter from 1990 to 2016 averaged over the North American and the European stations.
